# Supplementary material for: Detection of malachite green and leucomalachite green based on electrochemiluminescence of mono- and bimetallic ruthenium tris-bipyridyl complexes at an Au electrode
Source: Royal Society of Chemistry journal article supplement (doi:10.1039/c2ay26010g), 2012-12-05
Supplement: c2ay26010g.pdf [file c2ay26010g.pdf]

## Supporting information

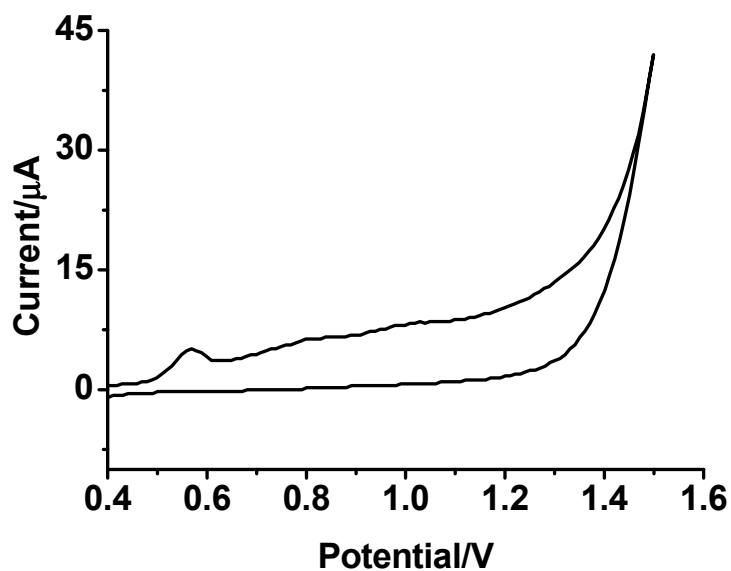

**Fig. S1.** Cyclic voltammetric curves of 1 mM MG in 0.1 M borate buffer (pH10) at Au electrode,

Scan rate: 100 mV/s.

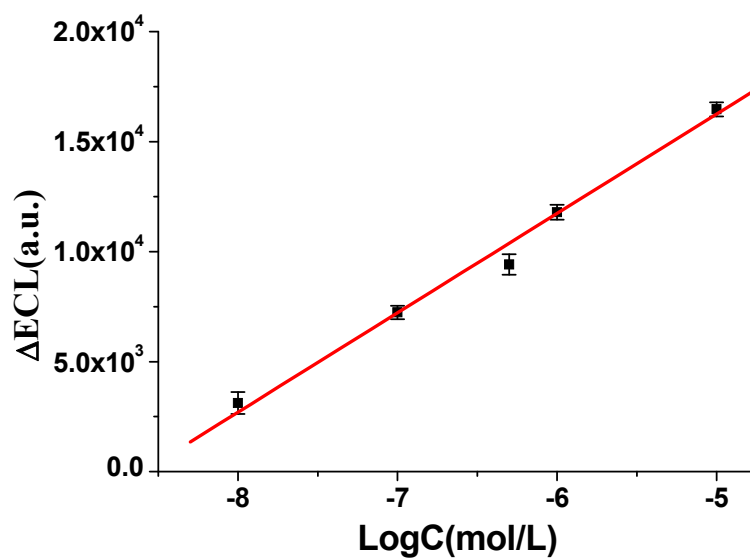

**Fig. S2** Dependence of the ECL increasing versus the logarithmic concentration of LMG with 1 mM Ru(bpy)<sub>3</sub><sup>2+</sup> in 0.1 M borate buffer (pH 10) at Au electrode.

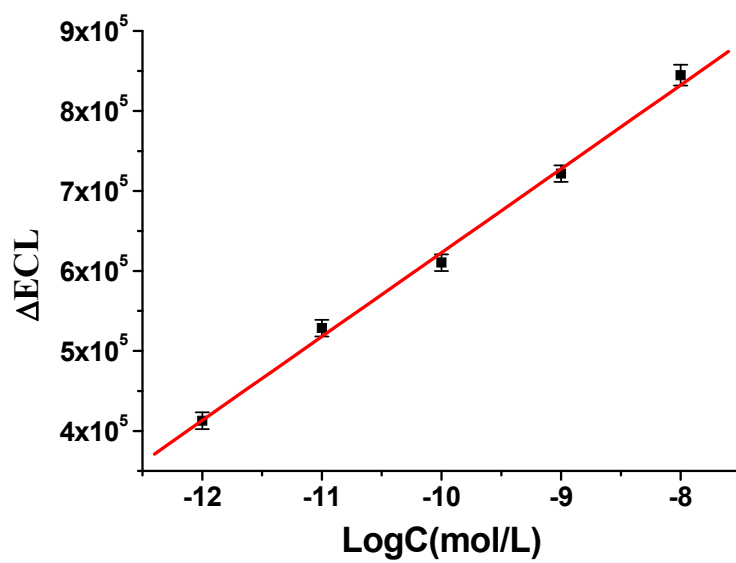

**Fig. S3** Dependence of the ECL increasing versus the logarithmic concentration of LMG with 0.4 mM bimetallic ruthenium in 0.1 M borate buffer (pH 10) at Au electrode.
